## RESEARCH ARTICLE

# Risk factors for blood transfusion in traumatic and postpartum hemorrhage patients: Analysis of the CRASH-2 and WOMAN trials

David A. Kolin<sup>1\*</sup>, Haleema Shakur-Still<sup>1</sup>, Adenike Bello<sup>2</sup>, Rizwana Chaudhri<sup>3</sup>, Imelda Bates<sup>4</sup>, Ian Roberts<sup>1</sup>

**1** Department of Population Health, Clinical Trials Unit, London School of Hygiene & Tropical Medicine, London, England, United Kingdom, **2** Department of Obstetrics and Gynecology, University of Ibadan, Ibadan, Nigeria, **3** Department Obstetrics and Gynecology, Rawalpindi Medical University, Rawalpindi, Pakistan, **4** Liverpool School of Tropical Medicine, Liverpool, England, United Kingdom

\* [david.kolin1@alumni.lshtm.ac.uk](mailto:david.kolin1@alumni.lshtm.ac.uk)

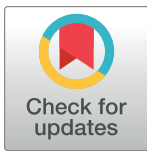

## Abstract

### OPEN ACCESS

**Citation:** Kolin DA, Shakur-Still H, Bello A, Chaudhri R, Bates I, Roberts I (2020) Risk factors for blood transfusion in traumatic and postpartum hemorrhage patients: Analysis of the CRASH-2 and WOMAN trials. *PLoS ONE* 15(6): e0233274. <https://doi.org/10.1371/journal.pone.0233274>

**Editor:** Arijit Biswas, Institute of Experimental Hematology and Transfusion Medicine, University Clinic of Bonn, GERMANY

**Received:** November 12, 2019

**Accepted:** April 30, 2020

**Published:** June 3, 2020

**Copyright:** © 2020 Kolin et al. This is an open access article distributed under the terms of the [Creative Commons Attribution License](https://creativecommons.org/licenses/by/4.0/), which permits unrestricted use, distribution, and reproduction in any medium, provided the original author and source are credited.

**Data Availability Statement:** Data for both the WOMAN and CRASH-2 trials can be accessed at <https://freebird.lshtm.ac.uk/>. The data is third-party data and can be easily accessed by registering and navigating to the “Available Trials” tab. Others would be able to access the data in the same manner as the authors. The authors did not have any special access privileges.

**Funding:** Funding for the CRASH-2 trial was provided by the UK NIHR Health Technology

## Background

Hemorrhage is a leading cause of death after trauma and childbirth. In response to severe hemorrhage, bleeding patients often receive transfusions of red blood cells, plasma, platelets, or other blood components. We examined risk factors for transfusion in acute severe bleeding in two trials of over 20,000 patients to better understand factors associated with transfusion likelihood.

## Study design and methods

We conducted a cohort analysis of data from the CRASH-2 and WOMAN trials, two multinational trials that recruited patients with traumatic and postpartum hemorrhage, respectively. For each trial, we examined the effect of 10 factors on blood transfusion likelihood. Univariate and multivariate Poisson regressions were used to analyze the relationship between risk factors and blood transfusion.

## Results

Of the 20,207 traumatic hemorrhage patients, 10,232 (51%) received blood components. Of the 20,060 women with postpartum hemorrhage, 10,958 (55%) received blood components. For patients who suffered from traumatic hemorrhage, those greater than three hours from injury to hospitalization were more likely to be transfused (ARR 1.37; 95% CI, 1.20–1.56). Postpartum hemorrhage patients had an increased likelihood of transfusion if they gave birth outside the hospital (ARR 1.30; 95% CI 1.22–1.39), gave birth more than three hours before hospitalization (ARR 1.09; 95% CI 1.01–1.17), had a Caesarean section (ARR 1.16; 95% CI 1.08–1.25), and if they had any identifiable causes of hemorrhage other than uterine atony.

Assessment Programme (<https://www.nihr.ac.uk/explore-nihr/funding-programmes/health-technology-assessment.htm>), Pfizer (<https://www.pfizer.com/>), the BUPA Foundation (<https://www.bupafoundation.org/>), and the J P Moulton Charitable Foundation (<http://www.perscitusllp.com/moulton-charitable-foundation/>). Funding for the WOMAN trial was provided by London School of Hygiene & Tropical Medicine ([lshtm.ac.uk](https://www.lshtm.ac.uk)), Pfizer (<https://www.pfizer.com/>), Department of Health (grant number HICF-T2-0510-007) (<https://www.gov.uk/government/organisations/department-of-health-and-social-care>), the Wellcome Trust (grant number WT094947) (<https://wellcome.ac.uk/>), and The Bill & Melinda Gates Foundation (grant number OPP1095618) (<https://www.gatesfoundation.org/>). Additional funding support was provided by the Rotary Foundation Global Grant Scholarship. All authors received all awards, except for the Rotary Foundation Global Grant Scholarship, which was solely received by DAK. The funders had no role in study design, data collection and analysis, decision to publish, or preparation of the manuscript.

**Competing interests:** With respect to Pfizer, the commercial funder for this trial, there are no other relevant declarations including any declarations related to employment, consultancy, patents, products in development, marketed products, etc. This does not alter our adherence to PLOS ONE policies on sharing data and materials.

**Abbreviations:** CI, Confidence interval; CRASH-2, Clinical Randomisation of an Antifibrinolytic in Significant Hemorrhage-2; WOMAN, World Maternal Antifibrinolytic Trial; ARR, Adjusted risk ratio; RR, Risk ratio.

## Conclusion

Several risk factors are associated with an increased likelihood of transfusion in traumatic and postpartum hemorrhage patients. Altering modifiable factors, by reducing time from injury or childbirth to hospitalization, for example, might be able to reduce transfusions and their complications.

## Trial registration

CRASH-2 is registered as [ISRCTN86750102](https://www.clinicaltrials.gov/ct2/show/study/NCT00375258), ClinicalTrials.gov [NCT00375258](https://www.clinicaltrials.gov/ct2/show/study/NCT00375258) and South African Clinical Trial Register DOH-27–0607–1919. WOMAN is registered as [ISRCTN76912190](https://www.clinicaltrials.gov/ct2/show/study/NCT00872469), ClinicalTrials.gov [NCT00872469](https://www.clinicaltrials.gov/ct2/show/study/NCT00872469), PACTR201007000192283, and EudraCT number 2008-008441-38.

## Introduction

World-wide about 10% of deaths are due to trauma. Deaths from trauma disproportionately affect people in lower income countries, with more than 90% of deaths due to injury occurring in low- and middle-income countries [1,2]. Approximately 40% of trauma deaths are due to bleeding, making hemorrhage the leading cause of death following injury [3]. Appropriate management of traumatic bleeding includes rapid identification of bleeding sources, followed by immediate measures to stem blood loss and restore hemodynamic stability [4]. Trauma patients who require massive transfusion or develop coagulopathy have poor outcomes [5,6].

Postpartum hemorrhage, typically defined as blood loss  $\geq 500$  mL within 24 hours of birth, is also a substantial cause of mortality. Postpartum hemorrhage occurs in about 6% of all childbirths and is responsible for up to 100,000 deaths each year (approximately one quarter of all maternal deaths) [7,8]. Risk factors for postpartum hemorrhage include prolonged third stage of labor, multiple births, fetal macrosomia, episiotomy and previous postpartum hemorrhage [9,10]. Almost all (99%) maternal hemorrhage deaths are in low and middle income countries [11].

Blood transfusions are often given to replace blood lost after traumatic and postpartum hemorrhage [12,13]. However, in low-income countries there is a limited supply of safe blood for transfusion [14]. Due to transfusion transmitted infections, low donation rates, sub-optimal management of blood stocks and inadequate distribution of blood, many low- and middle-income countries are unable to meet transfusion demand [15,16]. To better understand how both hemodynamic and non-hemodynamic risk factors influence transfusion likelihood, we assessed the risk factors associated with likelihood of transfusion in two large, previously-published multinational trials.

## Materials and methods

### Study design

The institutional review board of the London School of Hygiene & Tropical Medicine approved this study. This is a retrospective analysis of two randomized controlled trials. The details of the trial protocol and approval are published and publicly available. Data were analyzed anonymously.

The CRASH-2 trial was a randomized placebo-controlled trial of tranexamic acid in 20,207 bleeding trauma patients conducted in 274 hospitals in 40 countries [17]. Adult trauma patients with or at risk of acute significant hemorrhage, defined as hemorrhage within 8 hours of the injury, were randomly allocated to receive tranexamic acid or placebo. Baseline data were recorded prior to randomization. Outcome data were recorded at discharge from the randomizing hospital, 28 days after injury, or death, whichever came first [18].

The WOMAN trial was a randomized double-blind, placebo-controlled trial of tranexamic acid in 20,060 women with postpartum hemorrhage that was conducted in 193 hospitals in 21 countries. Women aged 16 years or older with a diagnosis of postpartum hemorrhage after vaginal birth or caesarean section were randomly allocated to tranexamic acid or placebo. The diagnosis of postpartum hemorrhage was clinical (estimated blood loss  $\geq 500$  mL after vaginal birth or  $\geq 1000$  mL after caesarean section). Baseline data were recorded prior to randomization. Outcome data were recorded at discharge from the randomizing hospital, 42 days after giving birth or death, whichever came first [19,20]. Neither the CRASH-2 trial nor the WOMAN trial found a significant difference in the incidence of transfusion by trial arm.

For the cohort analyses, the study outcome was defined as any blood component transfusion (whole or packed red blood cells, fresh frozen plasma, and other blood components). The exposure country income level, measured by gross national income per capita for each country, was classified according to the World Bank 2017 system, using the Atlas method (see appendix). The World Bank's method for classifying country income levels allows for inter-country income comparisons. The Atlas method reduces fluctuations in exchange rates by using a three-year moving average, price adjusted conversion factor [21]. For trauma patients, potential risk factors were systolic blood pressure, age, sex, Glasgow Coma Score, injury type, respiratory rate, heart rate, capillary refill time, use of tranexamic acid, and time from injury to randomization (a proxy for the time elapsed from injury to the diagnosis of hemorrhage) [22,23]. For women with postpartum hemorrhage, potential risk factors were systolic blood pressure, age, hospital childbirth, type of birth, placenta fully expelled, primary cause of hemorrhage, estimated blood loss, clinical signs of hemodynamic instability, use of tranexamic acid, and time from childbirth to randomization (a proxy for the time elapsed from delivery to the diagnosis of postpartum hemorrhage) [24,25]. The adjustments for use of tranexamic acid were used as a sensitivity analysis to determine if the randomized intervention also acted as a risk factor.

## Statistics

For statistical analyses, we used Stata 14 and R, version 3.4.3. *A priori*, we created subgroups for risk factors and outcomes based on commonly-used strata for each factor. To show the frequency distribution of blood component transfusions, we prepared histograms of blood transfusion volumes by country income group. We cross tabulated exposures and outcome, including both missing and present data. For variables with more than 1% missing data, we explored baseline characteristics of participants with missing data to understand how participants with and without missing data differed. We conducted univariate analyses to examine risk factors for transfusion. To avoid the possibility of failed convergence with the log-binomial model, we used a robust, correlation-adjusted Poisson model to estimate relative risks [26,27]. Univariate robust effects Poisson models were used to calculate crude risk ratios, adjusted for clustering of subjects by hospital. A backwards approach was used to create a multivariate correlation-adjusted Poisson model. Variables were individually removed from the model to assess for confounding and collinearity. To produce our multivariate model, we controlled for all variables of interest, including factors indicative of bleeding severity. Hemodynamic factors were determined based on a pathophysiological understanding of the

mechanisms of hemorrhage. For the CRASH-2 trial, variables reflective of bleeding severity were systolic blood pressure, Glasgow Coma Score, respiratory rate, heart rate, and capillary refill time. For the WOMAN trial, variables reflective of hemodynamic status were systolic blood pressure, estimated blood loss, and clinical signs of hemodynamic instability. We also examined the association between country income level and the receipt of single unit blood component transfusions to better understand how factors such as low blood supplies in low income countries affect the receipt of blood transfusions.

## Results

### Trauma patients

**Table 1** shows the characteristics of the 20,207 participants included in the CRASH-2 trial. 10,232 (51%) participants were transfused with blood components. Average time from injury to randomization was 3.3 hours, with 37% (7,478) in the  $\leq 1$  hour group. In this cohort, 16,935 (84%) participants were male, 13,692 (68%) had systolic blood pressure  $\geq 90$  mmHg, and 12,132 (60%) were recruited from lower-middle-income countries. The average age of study participants was 34.6 years. The frequencies of blood transfusion for high-income, upper-middle-income, lower-middle-income, and low-income countries were 80%, 54%, 48%, and 72%, respectively. For those who were transfused with blood components, the volume of blood components transfused differed by country income group (**Fig 1**). With decreasing country income level, the frequency of single unit blood transfusions increased: high-income (3%), upper-middle-income (13%), lower-middle-income (22%), and low-income (28%). Patients with blunt and penetrating injury were more likely to receive a transfusion than patients with blunt injury alone (RR 1.18; 95% CI 1.03–1.36). In univariate analyses, age and sex did not affect transfusion likelihood. Compared with patients with systolic blood pressure  $\geq 90$  mmHg, those with a systolic blood pressure  $\leq 90$  mmHg had an increased risk of blood transfusion. Of the risk factors included in this study, only one had  $>1\%$  missing data. 611 (3%) patients were missing data on capillary refill time, and they had a higher risk of transfusion than participants without missing data (RR 1.12; 95% CI 1.04–1.20). Only 80 participants ( $<1\%$ ) had missing data on blood component transfusion.

To control for confounding, we calculated adjusted risk ratios (ARR). Relative to patients in high-income countries, patients in lower-middle-income countries were less likely to receive a blood component transfusion (ARR 0.66; 95% CI 0.55–0.80). The decreased frequency of blood transfusion in lower income countries was evident even for blood transfusions greater than one unit (**Table 2**). Analyses of single unit blood transfusion indicated increasing likelihood of single unit blood transfusion with decreasing country income level. Relative to patients in high-income countries, traumatic hemorrhage patients in low-income countries had over 10 times the risk of single unit blood transfusion (ARR 10.04; 95% CI 4.06–24.82).

After adjustment, there was some evidence that female sex was associated with an increased risk of blood transfusion (ARR 1.05; 95% CI 1.00–1.10). The adjusted relative risks for time from injury to randomization were 1.25 (95% CI, 1.12–1.40) in patients in the 1–3 hour group and 1.37 (95% CI, 1.20–1.56) for patients in the  $>3$  hour group. Adjusting for all variables, blunt and penetrating injury were associated with a 12% greater risk of transfusion when compared to blunt injury alone. Amongst hemodynamic factors, the greatest likelihood of transfusion was for patients with systolic blood pressure  $\leq 75$  (ARR 1.53; 95% CI 1.41–1.65) and for patients with heart rate  $>107$  (ARR 1.37; 95% CI 1.25–1.51).

### Women with postpartum hemorrhage

**Table 3** shows data for the 20,060 women enrolled in the WOMAN trial. Of the study participants, 10,958 (55%) received blood component transfusions. Time from childbirth to

**Table 1. Analysis of risk factors for blood transfusion in traumatic hemorrhage patients.**

| Variable                          | Total         | Blood component transfusion (% transfused) | Crude risk ratio (95% CI) | Adjusted risk ratio* (95% CI) |
|-----------------------------------|---------------|--------------------------------------------|---------------------------|-------------------------------|
| Country income group <sup>†</sup> |               |                                            |                           |                               |
| High                              | 417 (2.1%)    | 381 (80.0%)                                | 1                         | 1                             |
| Upper-middle                      | 7594 (37.6%)  | 4039 (53.5%)                               | 0.65 (0.58–0.72)          | 0.78 (0.66–0.91)              |
| Lower-middle                      | 12132 (60.0%) | 5766 (47.9%)                               | 0.58 (0.49–0.68)          | 0.66 (0.55–0.80)              |
| Low                               | 64 (0.3%)     | 46 (71.9%)                                 | 0.87 (0.82–0.91)          | 0.73 (0.63–0.85)              |
| Age (years)                       |               |                                            |                           |                               |
| <25                               | 5638 (27.9%)  | 2810 (50.0%)                               | 1                         | 1                             |
| 25–34                             | 6093 (30.2%)  | 3105 (51.1%)                               | 1.02 (0.97–1.07)          | 1.01 (0.97–1.05)              |
| 35–44                             | 3816 (18.9%)  | 1953 (51.4%)                               | 1.03 (0.97–1.09)          | 1.00 (0.96–1.04)              |
| >44                               | 4656 (23.0%)  | 2363 (51.0%)                               | 1.02 (0.94–1.10)          | 0.98 (0.92–1.04)              |
| Unknown                           | 4 (<0.1%)     |                                            |                           |                               |
| Sex                               |               |                                            |                           |                               |
| Male                              | 16935 (83.8%) | 8493 (50.4%)                               | 1                         | 1                             |
| Female                            | 3271 (16.2%)  | 1738 (53.4%)                               | 1.06 (0.99–1.14)          | 1.05 (1.00–1.10)              |
| Unknown                           | 1 (<0.1%)     |                                            |                           |                               |
| Time since injury (h)             |               |                                            |                           |                               |
| ≤1                                | 7478 (37.0%)  | 3248 (43.6%)                               | 1                         | 1                             |
| 1–3                               | 6051 (30.0%)  | 3263 (54.1%)                               | 1.24 (1.08–1.43)          | 1.25 (1.12–1.40)              |
| >3                                | 6667 (33.0%)  | 3715 (56.0%)                               | 1.28 (1.10–1.50)          | 1.37 (1.20–1.56)              |
| Unknown                           | 11 (<0.1%)    |                                            |                           |                               |
| Injury type                       |               |                                            |                           |                               |
| Blunt                             | 11189 (55.4%) | 5557 (49.8%)                               | 1                         | 1                             |
| Penetrating                       | 6552 (32.4%)  | 3229 (49.5%)                               | 0.99 (0.88–1.12)          | 1.01 (0.92–1.11)              |
| Blunt and penetrating             | 2466 (12.2%)  | 1446 (59.0%)                               | 1.18 (1.03–1.36)          | 1.12 (1.00–1.25)              |
| Systolic blood pressure (mmHg)    |               |                                            |                           |                               |
| ≥90                               | 13692 (67.8%) | 5742 (42.1%)                               | 1                         | 1                             |
| 76–89                             | 3312 (16.4%)  | 2159 (65.5%)                               | 1.55 (1.41–1.72)          | 1.41 (1.29–1.53)              |
| ≤75                               | 3174 (15.7%)  | 2110 (73.5%)                               | 1.75 (1.57–1.95)          | 1.53 (1.41–1.65)              |
| Unknown                           | 29 (0.1%)     |                                            |                           |                               |
| Glasgow Coma Score (total)        |               |                                            |                           |                               |
| Mild (13–15)                      | 13842 (68.5%) | 6499 (47.1%)                               | 1                         | 1                             |
| Moderate (9–12)                   | 2704 (13.4%)  | 1536 (57.0%)                               | 1.21 (1.04–1.41)          | 1.05 (0.92–1.19)              |
| Severe (3–8)                      | 3638 (18.0%)  | 2190 (60.5%)                               | 1.28 (1.13–1.46)          | 1.11 (1.00–1.24)              |
| Unknown                           | 23 (0.1%)     |                                            |                           |                               |
| Respiratory rate (per min)        |               |                                            |                           |                               |
| <10                               | 305 (1.5%)    | 207 (68.1%)                                | 1.40 (1.11–1.77)          | 1.02 (0.76–1.38)              |
| 10–29                             | 16791 (83.1%) | 8117 (48.5%)                               | 1                         | 1                             |
| >29                               | 2920 (14.5%)  | 1788 (61.6%)                               | 1.27 (1.16–1.39)          | 1.08 (1.00–1.17)              |
| Unknown                           | 191 (1.0%)    |                                            |                           |                               |
| Heart rate (beats per min)        |               |                                            |                           |                               |
| <77                               | 1746 (8.6%)   | 742 (42.8%)                                | 1.15 (1.05–1.26)          | 1.06 (0.98–1.15)              |
| 77–91                             | 3497 (17.3%)  | 1298 (37.2%)                               | 1                         | 1                             |
| 92–107                            | 5102 (25.3%)  | 2279 (44.9%)                               | 1.21 (1.12–1.30)          | 1.16 (1.09–1.24)              |
| >107                              | 9725 (48.1%)  | 5804 (59.9%)                               | 1.61 (1.45–1.79)          | 1.37 (1.25–1.51)              |
| Unknown                           | 137 (0.7%)    |                                            |                           |                               |
| Central capillary refill time (s) |               |                                            |                           |                               |
| ≤2                                | 6838 (33.8%)  | 3017 (44.3%)                               | 1                         | 1                             |

(Continued)

Table 1. (Continued)

| Variable | Total        | Blood component transfusion (% transfused) | Crude risk ratio (95% CI) | Adjusted risk ratio* (95% CI) |
|----------|--------------|--------------------------------------------|---------------------------|-------------------------------|
| 3–4      | 9387 (46.5%) | 4746 (50.7%)                               | 1.14 (0.95–1.38)          | 1.05 (0.90–1.22)              |
| >4       | 3371 (16.7%) | 2124 (63.3%)                               | 1.43 (1.20–1.70)          | 1.13 (0.96–1.32)              |
| Unknown  | 611 (3.0%)   |                                            |                           |                               |

\*Adjusted variables include age, sex, time since injury, injury type, systolic blood pressure, Glasgow Coma Score, respiratory rate, heart rate, central capillary refill time, and use of tranexamic acid

†Income group was defined according to the World Bank's June 2017 classification system

<https://doi.org/10.1371/journal.pone.0233274.t001>

randomization was 3.4 hours, on average, with 48% of patients (9,585) in the  $\leq 1$  hour group. 88% (17,625) of women delivered in the hospital. The frequencies of blood transfusion for patients in high-income, upper-middle-income, lower-middle-income, and low-income countries were 36%, 30%, 61%, and 40%, respectively. For women transfused with blood components, transfusion volume differed by country income group (Fig 2). With decreasing country income level, the frequency of single unit blood component transfusions increased: high-income (2%), upper-middle-income (25%), lower-middle-income (32%), and low-income (39%). Age was a risk factor for blood transfusion in women with postpartum hemorrhage. Relative to patients in the  $\leq 25$  year age category, patients in the  $> 33$  year age category had a 24% increased risk of blood transfusion. Childbirth outside of the hospital increased the risk of blood component transfusion (RR 1.54; 95% CI 1.41–1.67). If time from delivery to randomization was  $> 3$  hours, the risk of blood transfusion increased, both for women who delivered outside of the hospital (RR 1.26; 95% CI 1.05–1.52) and women who delivered inside of the hospital (RR 1.14; 95% CI 1.03–1.26). Of the exposures investigated in the WOMAN trial, no

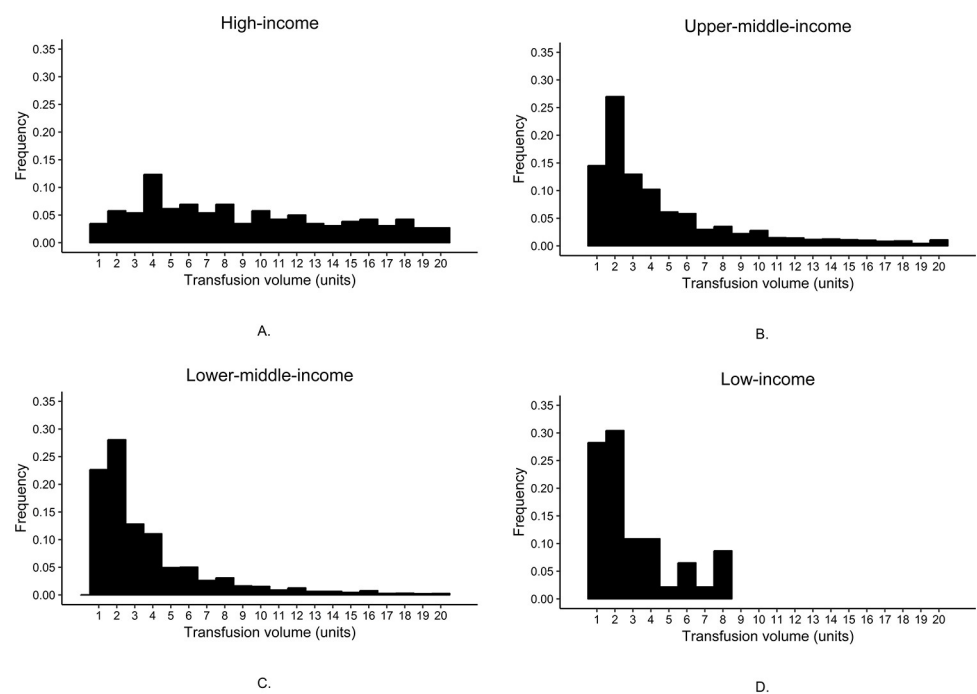

**Fig 1.** The frequency of blood transfusion volumes differs by country income group in traumatic hemorrhage patients: high-income (A), upper-middle-income (B), lower-middle-income (C), and low-income (D).

<https://doi.org/10.1371/journal.pone.0233274.g001>



**Table 2. Adjusted risk ratios for blood transfusion by country income group after traumatic hemorrhage.**

| Country income group <sup>†</sup> | Crude risk ratio (95% CI) | Adjusted risk ratio (95% CI) <sup>*</sup> |
|-----------------------------------|---------------------------|-------------------------------------------|
| Outcome: >1 unit transfusion      |                           |                                           |
| High                              | 1                         | 1                                         |
| Upper-middle                      | 0.57 (0.48–0.68)          | 0.70 (0.57–0.86)                          |
| Lower-middle                      | 0.46 (0.39–0.55)          | 0.55 (0.45–0.67)                          |
| Low                               | 0.64 (0.60–0.68)          | 0.54 (0.45–0.64)                          |
| Outcome: 1 unit transfusion       |                           |                                           |
| High                              | 1                         | 1                                         |
| Upper-middle                      | 3.28 (1.04–10.31)         | 4.87 (1.85–12.80)                         |
| Lower-middle                      | 4.91 (1.72–14.03)         | 6.24 (2.50–15.59)                         |
| Low                               | 9.34 (3.35–26.03)         | 10.04 (4.06–24.82)                        |

\* Adjusted variables include age, sex, time since injury, injury type, systolic blood pressure, Glasgow Coma Score, respiratory rate, heart rate, central capillary refill time, and use of tranexamic acid

<sup>†</sup> Income group was defined according to the World Bank's June 2017 classification system

<https://doi.org/10.1371/journal.pone.0233274.t002>

risk factor had >1% missing data. In the WOMAN trial, only 43 (<1%) of trial participants had missing outcome data.

After adjustment, there was strong evidence of an increase in transfusion likelihood in lower-middle-income countries (ARR 1.55; 95% CI 1.30–1.85). However, this association disappeared upon analysis of blood transfusions greater than one unit, and all risk ratios decreased in magnitude (Table 4). When single unit blood transfusions were excluded, the adjusted relative risk for lower-middle-income countries was 1.07 (95% CI 0.89–1.28), and there was only evidence of a decrease in risk in low-income countries relative to high-income countries (ARR 0.67; 95% CI 0.49–0.91). Lower country income level was associated with an increased risk of single unit blood transfusion. Patients in lower-middle-income countries had the greatest risk of single unit blood transfusion (ARR 24.40; 95% CI 13.82–43.07).

After controlling for severity of bleeding there was no association between maternal age and the risk of transfusion. Childbirth outside of the hospital was associated with an increased risk of transfusion (ARR 1.30; 95% CI 1.22–1.39). Adjusted risk ratios for increasing time since childbirth indicated a moderate increase in transfusion likelihood in women >3 hours after childbirth (ARR 1.09; 95% CI 1.01–1.17). While caesarean section increased the risk of transfusion (ARR 1.16; 95% CI 1.08–1.25), incomplete expulsion of the placenta did not (ARR 1.00; 95% CI 0.95–1.06). All identifiable causes of hemorrhage—including surgical trauma or tears, placenta previa or accreta, and other causes of hemorrhage—were associated with an increased likelihood of transfusion relative to uterine atony. Amongst hemodynamic factors, blood loss >1500 mL was associated with the greatest likelihood of transfusion (ARR 2.84; 95% CI 2.12–3.78).

## Discussion

For patients who suffered from traumatic hemorrhage, the only risk factor for transfusion, other than variables indicative of hemodynamic status, is time since injury. Patients with postpartum hemorrhage have an increased likelihood of transfusion with childbirth outside of the hospital, increased time since childbirth, Caesarean section, and all identifiable causes of hemorrhage other than uterine atony. Our study shows that lower country income level is associated with lower transfusion likelihood in traumatic hemorrhage patients but is associated with higher transfusion likelihood in postpartum hemorrhage patients. In women with postpartum

Table 3. Analysis of risk factors for blood transfusion in postpartum hemorrhage patients.

| Variable                          | Total         | Blood component transfusion (% transfused) | Crude risk ratio (95% CI) | Adjusted risk ratio* (95% CI) |
|-----------------------------------|---------------|--------------------------------------------|---------------------------|-------------------------------|
| Country income group <sup>†</sup> |               |                                            |                           |                               |
| High                              | 569 (2.8%)    | 202 (35.8%)                                | 1                         | 1                             |
| Upper-middle                      | 566 (2.8%)    | 168 (29.7%)                                | 0.83 (0.40–1.72)          | 0.98 (0.47–2.05)              |
| Lower-middle                      | 14718 (73.4%) | 8917 (60.7%)                               | 1.69 (1.36–2.11)          | 1.55 (1.30–1.85)              |
| Low                               | 4207 (21.0%)  | 1671 (39.8%)                               | 1.11 (0.86–1.44)          | 1.06 (0.84–1.33)              |
| Age (years)                       |               |                                            |                           |                               |
| ≤25                               | 6856 (34.2%)  | 3453 (50.5%)                               | 1                         | 1                             |
| 26–33                             | 9188 (45.8%)  | 5007 (54.6%)                               | 1.08 (1.03–1.14)          | 0.98 (0.94–1.02)              |
| >33                               | 4009 (20.0%)  | 2498 (62.4%)                               | 1.24 (1.16–1.32)          | 1.01 (0.96–1.06)              |
| Unknown                           | 7 (<0.1%)     |                                            |                           |                               |
| Hospital childbirth               |               |                                            |                           |                               |
| Yes                               | 17625 (87.9%) | 9039 (51.4%)                               | 1                         | 1                             |
| No                                | 2432 (12.1%)  | 1917 (79.0%)                               | 1.54 (1.41–1.67)          | 1.30 (1.22–1.39)              |
| Unknown                           | 3 (<0.1%)     |                                            |                           |                               |
| Time from childbirth (h)          |               |                                            |                           |                               |
| ≤1                                | 9585 (47.8%)  | 4754 (49.7%)                               | 1                         | 1                             |
| >1–3                              | 5369 (26.8%)  | 2892 (54.0%)                               | 1.09 (0.99–1.19)          | 1.01 (0.94–1.09)              |
| >3                                | 5091 (25.4%)  | 3303 (65.0%)                               | 1.31 (1.19–1.44)          | 1.09 (1.01–1.17)              |
| Unknown                           | 15 (<0.1%)    |                                            |                           |                               |
| Type of childbirth                |               |                                            |                           |                               |
| Vaginal childbirth                | 14219 (70.9%) | 6990 (49.3%)                               | 1                         | 1                             |
| Caesarean section                 | 5836 (29.1%)  | 3965 (68.1%)                               | 1.38 (1.29–1.48)          | 1.16 (1.08–1.25)              |
| Unknown                           | 5 (<0.1%)     |                                            |                           |                               |
| Placenta fully expelled           |               |                                            |                           |                               |
| Yes                               | 18105 (90.3%) | 9603 (53.2%)                               | 1                         | 1                             |
| No                                | 1952 (9.7%)   | 1353 (69.4%)                               | 1.30 (1.21–1.41)          | 1.00 (0.95–1.06)              |
| Unknown                           | 3 (<0.1%)     |                                            |                           |                               |
| Primary cause of hemorrhage       |               |                                            |                           |                               |
| Uterine atony                     | 12784 (63.7%) | 6282 (49.2%)                               | 1                         | 1                             |
| Surgical trauma or tears          | 3691 (18.4%)  | 2107 (57.2%)                               | 1.16 (1.07–1.26)          | 1.08 (1.01–1.15)              |
| Placenta previa or accreta        | 1878 (9.4%)   | 1457 (77.8%)                               | 1.58 (1.44–1.73)          | 1.19 (1.12–1.27)              |
| Other                             | 1457 (7.3%)   | 987 (67.9%)                                | 1.38 (1.21–1.57)          | 1.19 (1.10–1.29)              |
| Undetermined                      | 246 (1.2%)    | 123 (50%)                                  | 1.02 (0.83–1.24)          | 0.95 (0.82–1.11)              |
| Unknown                           | 4 (<0.1%)     |                                            |                           |                               |
| Systolic blood pressure (mmHg)    |               |                                            |                           |                               |
| ≥90                               | 16203 (80.8%) | 8176 (50.5%)                               | 1                         | 1                             |
| 76–89                             | 2179 (10.9%)  | 1486 (68.5%)                               | 1.36 (1.23–1.49)          | 1.07 (1.01–1.13)              |
| ≤75                               | 1673 (8.3%)   | 1295 (77.7%)                               | 1.54 (1.38–1.71)          | 1.10 (1.04–1.16)              |
| Unknown                           | 5 (<0.1%)     |                                            |                           |                               |
| Estimated blood loss (mL)         |               |                                            |                           |                               |
| ≤500                              | 608 (3.0%)    | 131 (21.6%)                                | 1                         | 1                             |
| >500 to ≤1000                     | 9810 (48.9%)  | 3820 (39.0%)                               | 1.81 (1.37–2.37)          | 1.69 (1.30–2.20)              |
| >1000 to ≤1500                    | 5714 (28.5%)  | 3680 (64.5%)                               | 2.99 (2.21–4.05)          | 2.39 (1.80–3.18)              |

(Continued)



Table 3. (Continued)

| Variable                                  | Total         | Blood component transfusion (% transfused) | Crude risk ratio (95% CI) | Adjusted risk ratio* (95% CI) |
|-------------------------------------------|---------------|--------------------------------------------|---------------------------|-------------------------------|
| >1500                                     | 3926 (19.6%)  | 3327 (85.1%)                               | 3.94 (2.88–5.39)          | 2.84 (2.12–3.78)              |
| Unknown                                   | 2 (<0.1%)     |                                            |                           |                               |
| Clinical signs of hemodynamic instability |               |                                            |                           |                               |
| No                                        | 8200 (40.9%)  | 3075 (37.5%)                               | 1                         | 1                             |
| Yes                                       | 11859 (59.1%) | 7883 (66.7%)                               | 1.78 (1.50–2.11)          | 1.43 (1.24–1.64)              |
| Unknown                                   | 1 (<0.1%)     |                                            |                           |                               |

\*Adjusted variables include country income group, age, hospital childbirth, time from childbirth, type of childbirth, placenta fully expelled, primary cause of hemorrhage, systolic blood pressure, estimated blood loss, clinical signs of hemodynamic instability, and use of tranexamic acid

†Income group was defined according to the World Bank's June 2017 classification system

<https://doi.org/10.1371/journal.pone.0233274.t003>

hemorrhage, these results are largely driven by the administration of single unit blood transfusions. In postpartum hemorrhage patients, exclusion of single unit blood transfusions reduces the risk of blood transfusion in all country income levels, relative to high-income countries.

Both studies were large, randomized placebo-controlled trials with minimal missing data. The likelihood of information bias was low for blood transfusion because it is a well-recorded outcome. However, measurement error may have occurred for some variables of interest like systolic blood pressure, raising the possibility of residual confounding.

Both the CRASH-2 and WOMAN trials were designed to assess the effect of tranexamic acid on patient outcomes, rather than to determine the risk factors for transfusion. Both studies did not collect data on some factors of interest, including blood availability and transfusion

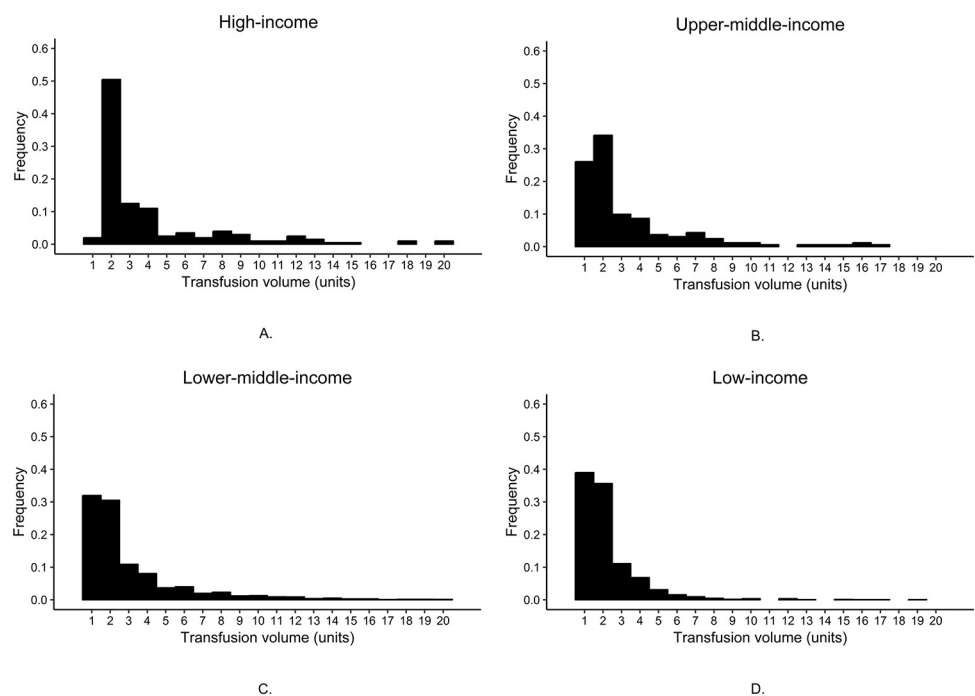

**Fig 2.** The frequency of blood transfusion volumes differs by country income group in postpartum hemorrhage patients: high-income (A), upper-middle-income (B), lower-middle-income (C), and low-income (D).

<https://doi.org/10.1371/journal.pone.0233274.g002>

**Table 4. Adjusted risk ratios for blood transfusion by country income group after postpartum hemorrhage.**

| Country income group <sup>†</sup> | Crude risk ratio (95% CI) | Adjusted risk ratio* (95% CI) |
|-----------------------------------|---------------------------|-------------------------------|
| Outcome: >1 unit transfusion      |                           |                               |
| High                              | 1                         | 1                             |
| Upper-middle                      | 0.63 (0.34–1.18)          | 0.84 (0.45–1.57)              |
| Lower-middle                      | 1.18 (0.92–1.51)          | 1.07 (0.89–1.28)              |
| Low                               | 0.69 (0.49–0.97)          | 0.67 (0.49–0.91)              |
| Outcome: 1 unit transfusion       |                           |                               |
| High                              | 1                         | 1                             |
| Upper-middle                      | 10.46 (3.13–35.00)        | 9.50 (2.81–32.11)             |
| Lower-middle                      | 27.09 (15.18–48.36)       | 24.40 (13.82–43.07)           |
| Low                               | 21.89 (11.98–39.99)       | 19.36 (10.77–34.80)           |

\*Adjusted variables include age, hospital childbirth, time from childbirth, type of childbirth, placenta fully expelled, primary cause of hemorrhage, systolic blood pressure, estimated blood loss, clinical signs of hemodynamic instability, and use of tranexamic acid

<sup>†</sup>Income group was defined according to the World Bank's June 2017 classification system

<https://doi.org/10.1371/journal.pone.0233274.t004>

practices. Country income level was a proxy for these unrecorded factors [28,29]. In future studies, recording data on more specific factors, that vary by country income level, would help reveal why transfusion likelihood differs by country income group.

We used log-link robust Poisson regression in this study for several reasons. First, such models allow for the direct assessment of risk ratios. Odds ratios may have overestimated the effect measures in this study due to the high incidence of blood transfusions. Second, binomial models for estimating relative risks often do not converge [26]. While we opted for a robust Poisson regression model in this study, the use of Poisson regression is known to produce conservative confidence intervals, suggesting that the true confidence intervals for the risk ratios would likely be narrower than those estimated.[30]

A stepwise approach was taken to generate multivariate Poisson regression models that accounted for confounders. We also adjusted for clustering at the hospital level. Even still, unmeasured confounding may account for some of this study's results. While we controlled for a number of factors relevant to severity of bleeding, residual confounding may still exist. Importantly, data on hemoglobin level were not obtained for either trial. Hemoglobin level is frequently used as a threshold marker for the initiation of blood transfusions [29,31]. While hemoglobin levels are typically known for patients in high income countries, these data are not always available in low income countries. However, in cases of acute hemorrhage, hemoglobin level is often not an appropriate indicator for transfusion [32].

Instead, hemodynamic factors tend to guide transfusion practices in both trauma and postpartum hemorrhage patients. Studies of blood transfusions in trauma settings suggest that patients with elevated blood pressures and normal heart rates are less likely to receive blood transfusions, including massive transfusions (greater than or equal to ten units of blood) [33,34]. This finding is influenced by the fact that, in settings of acute trauma, decisions to transfuse are often driven by the use of scoring systems like the shock index (defined as heart rate divided by systolic blood pressure). For women with postpartum hemorrhage, the decision to transfuse typically depends on estimated blood loss  $\geq 500$  mL, rising pulse, and decreasing blood pressure, as long as a reversible cause of hemorrhage is not confirmed [35]. If a cause of hemorrhage is identified, reversal of the underlying cause of hemorrhage is attempted prior to transfusion. Because hemodynamic variables are used as indicators to initiate blood

transfusions in both trauma and postpartum hemorrhage patients, it is not surprising that our findings—that hemodynamically unstable patients are more likely to be transfused—are consistent with previous work.

Likewise, our finding of less frequent large-volume blood transfusions in countries of lower income are consistent with other reports [36–38]. The availability and safety of blood components affects blood transfusion rates. The World Health Organization recommends a blood donation rate of at least 10 units per 1000 people per year. Currently, however, many countries do not meet minimum recommended donation rates. In high-income, upper-middle-income, lower-middle-income, and low-income countries, blood donation rates are 32.1, 14.9, 7.8, and 4.6 donations per 1000 people per year, respectively [15]. Due to low blood donation rates and high population prevalence rates of transfusion-transmissible infections, many low- and middle-income countries are unable to meet transfusion demand.

Differences in anemia may help explain the different transfusion practices in traumatic and postpartum hemorrhage. Anemia is more prevalent in pregnant women than non-pregnant women and is more prevalent in low-income settings than high-income settings [39]. Globally, 33% of non-pregnant women are anemic, and 40% of pregnant women are anemic, with significant variability by region [40,41]. One study, conducted in Southeast Asia, found that 80% of pregnant women and 60% of non-pregnant women were anemic [42]. For postpartum hemorrhage patients in low-income settings, low-volume blood transfusions may be used to simultaneously treat both acute postpartum hemorrhage and prevalent anemia [43–46].

For lower-middle-income countries in the WOMAN trial, limited blood supplies likely led to the frequent administration of single unit blood transfusions, despite the need for higher volume transfusions [47]. Most patients in the lower-middle-income country category were from Nigeria and Pakistan. One study found that many obstetric patients at one of the trial sites—University College Hospital, Ibadan—received single unit blood transfusions despite the need for additional units, based on estimated blood loss or low hematocrit values [48,49]. Similarly, in Pakistan, a 40% shortage of blood and blood components limits the amount of donated blood available for transfusion [50]. The higher frequency of single unit transfusions in low income countries may be driven by both lower blood donation rates and the higher frequency of anemia in low income countries. While restrictive transfusion practices in a range of settings have been shown to be beneficial, single unit transfusions may be insufficient to treat patients suffering from severe traumatic and postpartum hemorrhage [51–53].

Both increased time from trauma to hospitalization and increased time from childbirth to hospitalization increased the likelihood of transfusion. One explanation for these results may be that indicators of extended hypoperfusion, like tissue ischemia, are unaccounted for by measuring traditional hemodynamic factors such as blood pressure, leading to residual confounding. We also found that Caesarean section was associated with an increased risk of blood transfusion. One possible reason for this observation may be that Caesarean sections tend to be performed during more complicated pregnancies, where hemodynamic stability is compromised by additional pathology. Another possibility is that Caesarean sections are necessary due to insufficiently controlled bleeding. Factors that increase the likelihood of Caesarean section include placenta previa, fetal distress, breech presentation, and macrosomia [54,55]. We also found evidence that identifiable causes of hemorrhage other than uterine atony, including surgical trauma or tears, placenta previa or accreta, and other causes of hemorrhage, increased the likelihood of blood component transfusion. Differences in transfusion likelihood amongst causes of hemorrhage may relate to the effectiveness of managing bleeding arising from different causes. For example, for postpartum hemorrhage due to uterine atony, uterotonics are a first line treatment, and sometimes transfusion may be avoided by successful uterotonic intervention [56,57].

## Conclusions

Our study found that, for patients who suffered from traumatic hemorrhage, risk factors for transfusion were time since injury, country income level, and hemodynamic factors, including systolic blood pressure and heart rate. Patients with postpartum hemorrhage have an increased likelihood of transfusion with childbirth outside of the hospital, increased time since giving birth, Caesarean section, birth in lower-middle income countries, and all identifiable causes of hemorrhage other than uterine atony. Hemodynamic factors, including systolic blood pressure, estimated blood loss, and clinical signs of hemodynamic instability, were also associated with increased likelihood of transfusion in postpartum hemorrhage patients. The findings of this study have clinical implications. Altering modifiable factors, by reducing time from injury or childbirth to hospitalization, could reduce blood transfusions and complications associated with transfusions. Future studies should investigate subgroup analyses of the various factors that contribute to the association between risk factors and transfusion.

## Supporting information

**S1 Data.**  
(DOCX)

## Acknowledgments

We would like to thank the CRASH-2 and WOMAN trials' participants.

## Author Contributions

**Conceptualization:** David A. Kolin, Ian Roberts.

**Data curation:** David A. Kolin, Haleema Shakur-Still, Adenike Bello, Rizwana Chaudhri, Imelda Bates, Ian Roberts.

**Formal analysis:** David A. Kolin.

**Funding acquisition:** Haleema Shakur-Still, Ian Roberts.

**Investigation:** David A. Kolin, Haleema Shakur-Still.

**Methodology:** David A. Kolin.

**Project administration:** David A. Kolin.

**Resources:** David A. Kolin.

**Software:** David A. Kolin.

**Supervision:** Ian Roberts.

**Validation:** David A. Kolin.

**Visualization:** David A. Kolin.

**Writing – original draft:** David A. Kolin.

**Writing – review & editing:** David A. Kolin, Haleema Shakur-Still, Adenike Bello, Rizwana Chaudhri, Imelda Bates, Ian Roberts.

## References

1. World Health Organization. The scale of the problem. Global burden of disease; 2004.

2. Gosselin R. Injuries: the neglected burden in developing countries. *Bulletin of the World Health Organization*. 2009 Apr 1; 87(4):246–246.
3. Rossaint R, Bouillon B, Cerny V, Coats TJ, Duranteau J, Fernández-Mondéjar E, et al. Management of bleeding following major trauma: an updated European guideline. *Critical Care*. 2010; 14(2):R52.
4. Curry N, Hopewell S, Dorée C, Hyde C, Brohi K, Stanworth S. The acute management of trauma hemorrhage: a systematic review of randomized controlled trials. *Critical Care*. 2011; 15(2):R92.
5. Brohi K, Singh J, Heron M, Coats T. Acute Traumatic Coagulopathy: *The Journal of Trauma: Injury, Infection, and Critical Care*. 2003 Jun; 54(6):1127–30.
6. Frith D, Goslings JC, Gaarder C, Maegele M, Cohen MJ, Allard S, et al. Definition and drivers of acute traumatic coagulopathy: clinical and experimental investigations: Acute traumatic coagulopathy. *Journal of Thrombosis and Haemostasis*. 2010 Sep; 8(9):1919–25.
7. Carroli G, Cuesta C, Abalos E, Gulmezoglu AM. Epidemiology of postpartum haemorrhage: a systematic review. *Best Practice & Research Clinical Obstetrics & Gynaecology*. 2008 Dec; 22(6):999–1012.
8. World Health Organization. WHO recommendations for the prevention and treatment of postpartum haemorrhage. World Health Organization; 2012.
9. Combs CA, Murphy EL, Laros RK. Factors associated with postpartum hemorrhage with vaginal birth. *Obstet Gynecol*. 1991 Jan; 77(1):69–76.
10. Magann EF, Evans S, Hutchinson M, Collins R, Howard BC, Morrison JC. Postpartum hemorrhage after vaginal birth: an analysis of risk factors. *South Med J*. 2005 Apr; 98(4):419–22.
11. Snelgrove JW. Postpartum haemorrhage in the developing world a review of clinical management strategies. *Mcgill J Med*. 2009 Nov 16; 12(2):61.
12. National Heart, Lung, and Blood Institute. Blood transfusion [Internet]. [cited 2018 Jun 26]. Available from: <https://www.nhlbi.nih.gov/health-topics/blood-transfusion>
13. Sharma S, Sharma P, Tyler LN. Transfusion of blood and blood products: indications and complications. *Am Fam Physician*. 2011 Mar 15; 83(6):719–24.
14. Paydar S, Sabetian G, Khalili H, Abbasi HR, Bolandparvaz S, Ghahramani Z, et al. Shiraz Trauma Transfusion Score: A Scoring System for Blood Transfusion in Trauma Patients. *Bull Emerg Trauma*. 2016 Jul; 4(3):121–3.
15. World Health Organization. Global Status Report on Blood Safety and Availability. 2016.
16. Kyeyune-Byabazaire D, Hume HA. Towards a safe and sufficient blood supply in Sub-Saharan Africa. *ISBT Science Series*. 2019 Feb; 14(1):104–13.
17. Effects of tranexamic acid on death, vascular occlusive events, and blood transfusion in trauma patients with significant haemorrhage (CRASH-2): a randomised, placebo-controlled trial. *The Lancet*. 2010 Jul; 376(9734):23–32.
18. CRASH Trials Co-ordinating Centre Management Group. CRASH-2 Clinical Randomisation of an Antifibrinolytic in Significant Haemorrhage: Protocol [Internet]. 2005 [cited 2018 Jun 27]. Available from: [http://crash2.ishtm.ac.uk/Protocol\\_Eng.html](http://crash2.ishtm.ac.uk/Protocol_Eng.html)
19. The WOMAN Trial Protocol Committee. Tranexamic acid for the treatment of postpartum haemorrhage: an international randomised, double blind placebo controlled trial. *Clinical Trial Protocol*; 2014.
20. Shakur H, Roberts I, Fawole B, Chaudhri R, El-Sheikh M, Akintan A, et al. Effect of early tranexamic acid administration on mortality, hysterectomy, and other morbidities in women with post-partum haemorrhage (WOMAN): an international, randomised, double-blind, placebo-controlled trial. *The Lancet*. 2017 May; 389(10084):2105–16.
21. How does the World Bank classify countries? [Internet]. The World Bank; Available from: <https://datahelpdesk.worldbank.org/knowledgebase/articles/378834-how-does-the-world-bank-classify-countries>
22. Nunez TC, Voskresensky IV, Dossett LA, Shinnall R, Dutton WD, Cotton BA. Early Prediction of Massive Transfusion in Trauma: Simple as ABC (Assessment of Blood Consumption)? *The Journal of Trauma: Injury, Infection, and Critical Care*. 2009 Feb; 66(2):346–52.
23. Ilancheran A, Rahman F, Mitra B. Indications for blood transfusion following trauma—a pilot study. *Journal of Emergency Medicine, Trauma and Acute Care*. 2015 Jan; 2015(1):4.
24. Oya A, Nakai A, Miyake H, Kawabata I, Takeshita T. Risk factors for peripartum blood transfusion in women with placenta previa: a retrospective analysis. *J Nippon Med Sch*. 2008 Jun; 75(3):146–51.
25. Wikkelsø AJ, Hjortø S, Gerds TA, Møller AM, Langhoff-Roos J. Prediction of postpartum blood transfusion—risk factors and recurrence. *J Matern Fetal Neonatal Med*. 2014 Nov; 27(16):1661–7.
26. Chen W, Qian L, Shi J, Franklin M. Comparing performance between log-binomial and robust Poisson regression models for estimating risk ratios under model misspecification. *BMC Medical Research*

- Methodology [Internet]. 2018 Dec [cited 2019 Feb 17]; 18(1). Available from: <https://bmcmredsmethodol.biomedcentral.com/articles/10.1186/s12874-018-0519-5>
27. Zou G. A Modified Poisson Regression Approach to Prospective Studies with Binary Data. *American Journal of Epidemiology*. 2004 Apr 1; 159(7):702–6.
  28. Jenny HE, Saluja S, Sood R, Raykar N, Kataria R, Tongaonkar R, et al. Access to safe blood in low-income and middle-income countries: lessons from India. *BMJ Global Health*. 2017 May; 2(2):bmjgh-2016-000167.
  29. Kralievs KE, Raykar NP, Greenberg SLM, Meara JG. The global blood supply: a literature review. *The Lancet*. 2015 Apr; 385:S28.
  30. McNutt L-A. Estimating the Relative Risk in Cohort Studies and Clinical Trials of Common Outcomes. *American Journal of Epidemiology*. 2003 May 15; 157(10):940–3.
  31. Carson JL, Stanworth SJ, Roubinian N, Fergusson DA, Triulzi D, Doree C, et al. Transfusion thresholds and other strategies for guiding allogeneic red blood cell transfusion. Cochrane Injuries Group, editor. *Cochrane Database of Systematic Reviews* [Internet]. 2016 Oct 12 [cited 2018 Jun 18]; Available from: <http://doi.wiley.com/10.1002/14651858.CD002042.pub4>
  32. Gutierrez G, Reines HD, Wulf-Gutierrez ME. Clinical review: hemorrhagic shock. *Crit Care*. 2004 Oct; 8(5):373–81.
  33. Wu S-C, Rau C-S, Kuo SCH, Hsu S-Y, Hsieh H-Y, Hsieh C-H. Shock index increase from the field to the emergency room is associated with higher odds of massive transfusion in trauma patients with stable blood pressure: A cross-sectional analysis. Cheungpasitporn W, editor. *PLOS ONE*. 2019 Apr 25; 14(4):e0216153.
  34. Schroll R, Swift D, Tatum D, Couch S, Heaney JB, Llado-Farrulla M, et al. Accuracy of shock index versus ABC score to predict need for massive transfusion in trauma patients. *Injury* [Internet]. 2017 Sep [cited 2017 Dec 3]; Available from: <http://linkinghub.elsevier.com/retrieve/pii/S0020138317306253>
  35. Evensen A, Anderson JM, Fontaine P. Postpartum Hemorrhage: Prevention and Treatment. *Am Fam Physician*. 2017 Apr 1; 95(7):442–9.
  36. Roberts DJ, Field S, Delaney M, Bates I. Problems and Approaches for Blood Transfusion in the Developing Countries. *Hematology/Oncology Clinics of North America*. 2016 Apr; 30(2):477–95.
  37. Custer B, Zou S, Glynn SA, Makani J, Tayou Tagny C, El Ekiaby M, et al. Addressing gaps in international blood availability and transfusion safety in low- and middle-income countries: a NHLBI workshop: blood availability and transfusion safety in LMICs. *Transfusion*. 2018 May; 58(5):1307–17.
  38. Smit Sibinga CTh Abdella YE. Availability and safety of blood transfusion in low- and middle-income countries: availability and safety of blood. *Transfusion* [Internet]. 2019 Feb 27 [cited 2019 Apr 4]; Available from: <http://doi.wiley.com/10.1111/trf.15224>
  39. Balarajan Y, Ramakrishnan U, Özaltın E, Shankar AH, Subramanian S. Anaemia in low-income and middle-income countries. *The Lancet*. 2011 Dec; 378(9809):2123–35.
  40. World Health Organization. Prevalence of anemia among pregnant women (%) [Internet]. *Global Health Observatory Data Repository/World Health Statistics*; 2016. Available from: <https://data.worldbank.org/indicator/SH.PRG.ANEM?view=chart>
  41. World Health Organization. Prevalence of anemia among non-pregnant women (% of women ages 15–49) [Internet]. *Global Health Observatory Data Repository/World Health Statistics*; 2016. Available from: <https://data.worldbank.org/indicator/SH.ANM.NPRG.ZS>
  42. Trinh LTT, Dibley M. Anaemia in pregnant, postpartum and non pregnant women in Lak district, Daklak province of Vietnam. *Asia Pac J Clin Nutr*. 2007; 16(2):310–5.
  43. Berger MD, Gerber B, Arn K, Senn O, Schanz U, Stussi G. Significant reduction of red blood cell transfusion requirements by changing from a double-unit to a single-unit transfusion policy in patients receiving intensive chemotherapy or stem cell transplantation. *Haematologica*. 2012 Jan 1; 97(1):116–22.
  44. Thakkar R, Podlasek S, Rotello L, Ness P, Frank S. Two-Unit Red Cell Transfusions in Stable Anemic Patients. *Journal of Hospital Medicine*. 2017 Sep; 12(9):747–9.
  45. Heyes J, Kelly PA, Monaghan K, Lawn M, Dhese A, Mijovic A. A single unit transfusion policy reduces red cell transfusions in general medical in-patients. *QJM: An International Journal of Medicine*. 2017 Nov 1; 110(11):735–9.
  46. Frass KA. Postpartum hemorrhage is related to the hemoglobin levels at labor: Observational study. *Alexandria Journal of Medicine*. 2015 Dec; 51(4):333–7.
  47. Benedict N, Augustina A, Nosakhare B. Blood Donation in Nigeria: Standard of the Donated Blood. *Journal of Laboratory Physicians*. 2012; 4(2):94.

48. Akingbola TS. Obstetric Emergencies and Transfusion Needs in a Nigerian Hospital. *Hematology & Transfusion International Journal* [Internet]. 2016 Jul 30 [cited 2019 May 2];2(6). Available from: <http://medcraveonline.com/HTIJ/HTIJ-02-00051.php>
49. Roberts I, Shakur H, Fawole B, Kuti M, Olayemi O, Bello A, et al. Haematological and fibrinolytic status of Nigerian women with post-partum haemorrhage. *BMC Pregnancy and Childbirth* [Internet]. 2018 Dec [cited 2019 May 2];18(1). Available from: <https://bmcpregnancychildbirth.biomedcentral.com/articles/10.1186/s12884-018-1794-1>
50. Cheraghali AM. Blood safety concerns in the Eastern Mediterranean region. *Hepat Mon.* 2011 Jun; 11(6):422–6.
51. Holst LB, Petersen MW, Haase N, Perner A, Wetterslev J. Restrictive versus liberal transfusion strategy for red blood cell transfusion: systematic review of randomised trials with meta-analysis and trial sequential analysis. *BMJ.* 2015 Mar 24; 350(mar24 9):h1354–h1354.
52. Hirano Y, Miyoshi Y, Kondo Y, Okamoto K, Tanaka H. Liberal versus restrictive red blood cell transfusion strategy in sepsis or septic shock: a systematic review and meta-analysis of randomized trials. *Critical Care* [Internet]. 2019 Dec [cited 2020 Jan 20];23(1). Available from: <https://ccforum.biomedcentral.com/articles/10.1186/s13054-019-2543-1>
53. Estcourt LJ, Malouf R, Trivella M, Fergusson DA, Hopewell S, Murphy MF. Restrictive versus liberal red blood cell transfusion strategies for people with haematological malignancies treated with intensive chemotherapy or radiotherapy, or both, with or without haematopoietic stem cell support. Cochrane Haematological Malignancies Group, editor. *Cochrane Database of Systematic Reviews* [Internet]. 2017 Jan 27 [cited 2020 Jan 20]; Available from: <http://doi.wiley.com/10.1002/14651858.CD011305.pub2>
54. Hong D-H, Kim E, Kyeong K-S, Hong SH, Jeong E-H. Safety of cesarean delivery through placental incision in patients with anterior placenta previa. *Obstet Gynecol Sci.* 2016 Mar; 59(2):103–9.
55. Liu Y, Li G, Chen Y, Wang X, Ruan Y, Zou L, et al. A descriptive analysis of the indications for caesarean section in mainland China. *BMC Pregnancy and Childbirth* [Internet]. 2014 Dec [cited 2019 Jun 29]; 14(1). Available from: <http://bmcpregnancychildbirth.biomedcentral.com/articles/10.1186/s12884-014-0410-2>
56. Mousa HA, Blum J, Abou El Senoun G, Shakur H, Alfirevic Z. Treatment for primary postpartum haemorrhage. Cochrane Pregnancy and Childbirth Group, editor. *Cochrane Database of Systematic Reviews* [Internet]. 2014 Feb 12 [cited 2019 Jun 29]; Available from: <http://doi.wiley.com/10.1002/14651858.CD003249.pub3>
57. Sebghati M, Chandrarahan E. An update on the risk factors for and management of obstetric haemorrhage. *Women's Health.* 2017 Aug; 13(2):34–40.
